# Supplementary material
Source: publisher figshare collection journal article supplement (https://acs.figshare.com/ndownloader/files/4118155)
Supplement: Supplementary file 1 [file 4118155]

## Supporting Information

### Manipulating the Morphology of P3HT-PCBM Bulk Heterojunction Blends with Solvent Vapor Annealing

Eric Verploegen<sup>1,2</sup>, Chad E. Miller<sup>2</sup>, Kristin Schmidt<sup>2</sup>, Zhenan Bao<sup>1</sup>, Micheal F. Toney<sup>2</sup>

<sup>1</sup>Department of Chemical Engineering, Stanford University, Stanford, CA 94305,

<sup>2</sup>Stanford Synchrotron Radiation Lightsource, Menlo Park, CA 94025

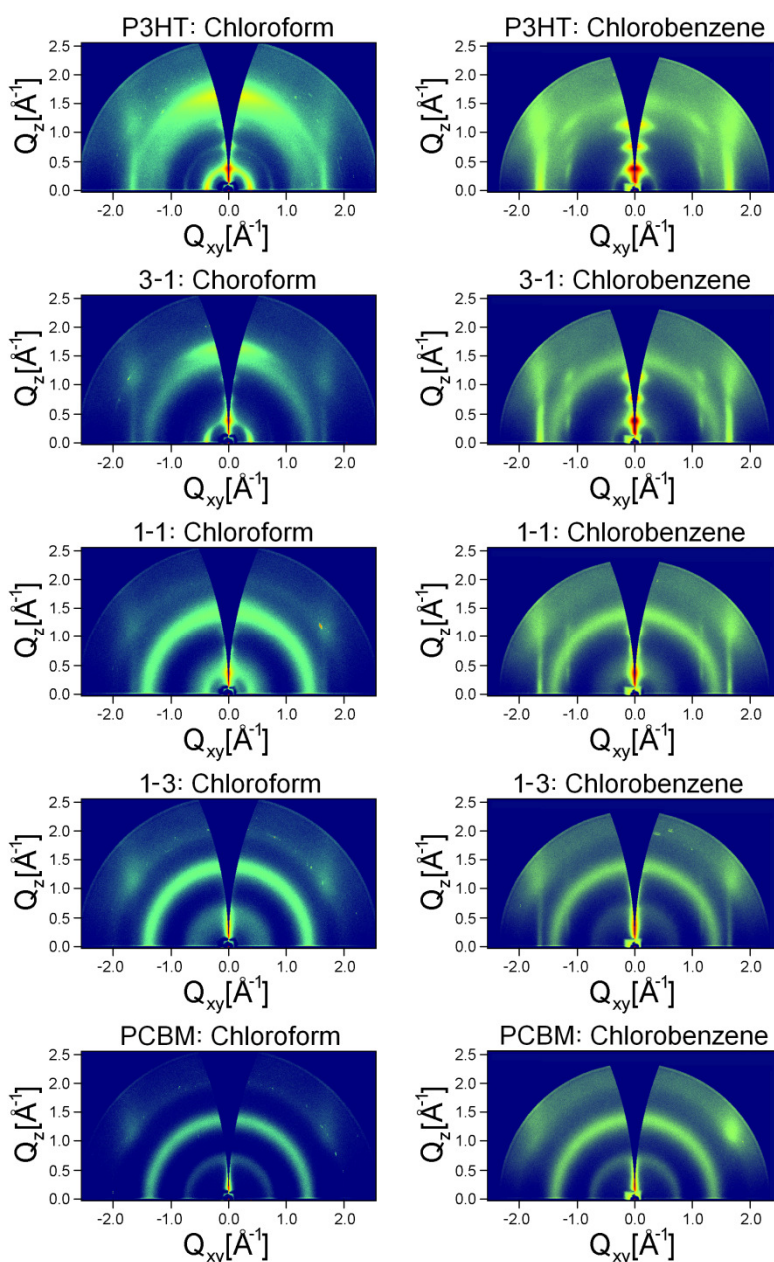

**Figure S1.** 2-D GIWAXS images as-cast thin films, top to bottom: of P3HT, 3:1 P3HT-PCBM blend, 1:1 P3HT-PCBM blend, 1:3 P3HT-PCBM blend, and PCBM. The images on the left are spin cast from 2 mg/mL in chloroform, and the images in the right are spin cast from 2 mg/mL in chlorobenzene.

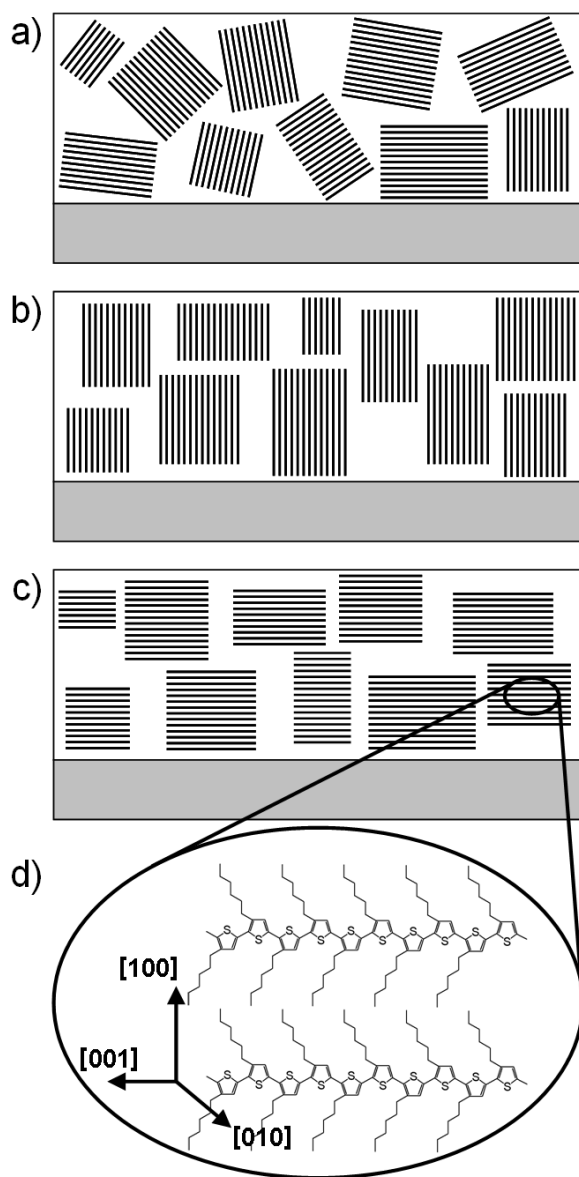

**Figure S2.** Cartoons of P3HT thin films with a) random, b) perpendicular, and c) parallel P3HT lamellae orientations relative to the substrate. The crystallographic directions are shown relative to the molecular structure in d). The P3HT layers lie in the (100) plane, the [100] direction is normal to the P3HT layers, the  $\pi$ -face lies in the (020) plane, the  $\pi$ - $\pi$  stacking direction is along the [010] direction, and the chain backbone is along the [001] direction. (Figure taken from Verploegen et.al. *Advanced Functional Materials* **2010**, 20, (20), 3519-3529)

**Table S1.** Layer spacing and FWHM of P3HT in thin films spin cast from 2 mg/mL in chloroform and 2 mg/mL in chlorobenzene (see Figure S1). The layer spacing was determined by integration of the nominally out-of-plane (200) peak (The region selected for subsequent quantitative analysis is shown in Figure S3 of the supplementary information).

| <u>Blend</u> | <u>Spin casting solvent</u> | <u>Layer spacing (<math>\text{\AA}</math>)</u> | <u>FWHM (<math>\text{\AA}^{-1}</math>)</u> | <u>Boiling Point (<math>^{\circ}\text{C}</math>)</u> |
|--------------|-----------------------------|------------------------------------------------|--------------------------------------------|------------------------------------------------------|
| P3HT         | Chloroform                  | 16.68                                          | 0.103                                      | 61                                                   |
| P3HT         | Chlorobenzene               | 16.41                                          | 0.081                                      | 131                                                  |
| 3-1          | Chloroform                  | 16.72                                          | 0.107                                      | 61                                                   |
| 3-1          | Chlorobenzene               | 16.41                                          | 0.084                                      | 131                                                  |
| 1-1          | Chloroform                  | 16.86                                          | 0.121                                      | 61                                                   |
| 1-1          | Chlorobenzene               | 16.78                                          | 0.109                                      | 131                                                  |

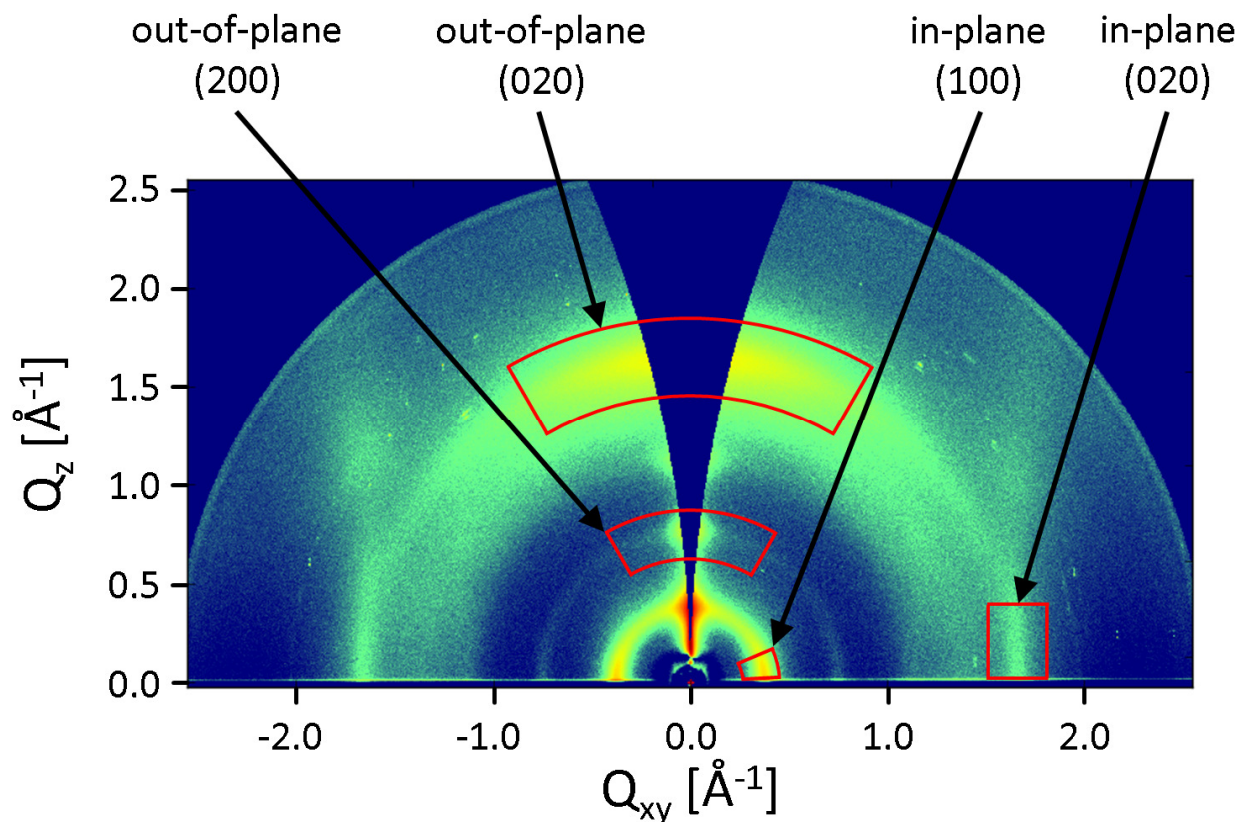

**Figure S3.** 2-D GIWAXS image of as-cast P3HT thin film. The red boxes indicate the region where the peak integration takes place. A cake slice was taken from  $q = 0.26 \text{ \AA}^{-1}$  to  $0.45 \text{ \AA}^{-1}$  and  $\chi = 3^{\circ}$  to  $20^{\circ}$  was used for analysis of the in-plane (100) peak. A cake slice was taken from  $q = 0.62 \text{ \AA}^{-1}$  to  $0.86 \text{ \AA}^{-1}$  and  $\chi = 60^{\circ}$  to  $120^{\circ}$  was used for analysis of the nominally out-of-plane (200) peak. A cake slice was taken from  $q = 1.45 \text{ \AA}^{-1}$  to  $1.85 \text{ \AA}^{-1}$  and  $\chi = 60^{\circ}$  to  $120^{\circ}$  was used for analysis of the nominally out-of-plane (020) peak, and a box from  $q_{xy} = 1.5 \text{ \AA}^{-1}$  to  $1.8 \text{ \AA}^{-1}$  and  $q_z = 0.03 \text{ \AA}^{-1}$  to  $0.40 \text{ \AA}^{-1}$  was used for analysis of the in-plane (020) peak.

**Table S2.** P3HT layer spacing, layer FWHM,  $\pi$ - $\pi$  stacking distance,  $\pi$ - $\pi$  FWHM for each solvent, before, during, and after SVA; for neat P3HT, 3-1, and 1-1 blends spin cast from 2 mg/mL in chloroform. Percent change can be found in Table S3 below. Layer spacing values were determined by integration of the in-plane (100) peak, and the  $\pi$ - $\pi$  stacking distance was determined by integration of the nominally out-of-plane (020) peak (The regions selected for subsequent quantitative analysis is shown in Figure S3).

| Film composition | Solvent vapor | Layer spacing |        |       | Layer FWHM |        |       | $\pi$ - $\pi$ stacking distance |        |       | $\pi$ - $\pi$ FWHM |        |       |
|------------------|---------------|---------------|--------|-------|------------|--------|-------|---------------------------------|--------|-------|--------------------|--------|-------|
|                  |               | before        | during | after | before     | during | after | before                          | during | after | before             | during | after |
| P3HT             | Chloroform    | 16.73         | 17.24  | 17.00 | 0.054      | 0.046  | 0.045 | 3.83                            | 3.80   | 3.76  | 0.152              | 0.129  | 0.132 |
|                  | Hexane        | 16.72         | 17.35  | 16.96 | 0.056      | 0.058  | 0.054 | 3.81                            | 3.81   | 3.80  | 0.146              | 0.146  | 0.144 |
|                  | THF           | 16.67         | 17.10  | 16.73 | 0.058      | 0.049  | 0.047 | 3.81                            | 3.79   | 3.75  | 0.142              | 0.128  | 0.133 |
| 3:1              | Chloroform    | 16.62         | 17.17  | 17.09 | 0.059      | 0.049  | 0.049 | 3.83                            | 3.79   | 3.72  | 0.147              | 0.124  | 0.136 |
|                  | Hexane        | 16.70         | 17.27  | 16.97 | 0.059      | 0.058  | 0.056 | 3.83                            | 3.83   | 3.82  | 0.143              | 0.145  | 0.143 |
|                  | THF           | 16.62         | 16.98  | 16.78 | 0.060      | 0.050  | 0.049 | 3.83                            | 3.81   | 3.75  | 0.146              | 0.129  | 0.130 |
| 1:1              | Chloroform    | 16.55         | 17.07  | 17.15 | 0.083      | 0.049  | 0.049 | -                               | -      | -     | -                  | -      | -     |
|                  | Hexane        | 16.55         | 17.25  | 17.01 | 0.089      | 0.063  | 0.057 | -                               | -      | -     | -                  | -      | -     |
|                  | THF           | 16.44         | 16.89  | 16.82 | 0.096      | 0.045  | 0.045 | -                               | -      | -     | -                  | -      | -     |

**Table S3:** P3HT percent change for layer spacing, layer FWHM,  $\pi$ - $\pi$  stacking distance,  $\pi$ - $\pi$  FWHM for each solvent, before, during, and after SVA (for neat P3HT, 3-1, and 1-1 blends spin cast from 2 mg/mL in chloroform). Layer spacing values were determined by integration of the in-plane (100) peak, and the  $\pi$ - $\pi$  stacking distance was determined by integration of the nominally out-of-plane (020) peak (The regions selected for subsequent quantitative analysis is shown in Figure S3 of the supplementary information).

| Film composition | Solvent vapor | Layer spacing |         | Layer FWHM |         | $\pi$ - $\pi$ stacking distance |         | $\pi$ - $\pi$ FWHM |         |
|------------------|---------------|---------------|---------|------------|---------|---------------------------------|---------|--------------------|---------|
|                  |               | % during      | % after | % during   | % after | % during                        | % after | % during           | % after |
| P3HT             | Chloroform    | 3.04          | 1.60    | -13.75     | -16.54  | -0.94                           | -2.01   | -15.11             | -12.86  |
|                  | Hexane        | 3.79          | 1.45    | 4.11       | -3.04   | 0.03                            | -0.24   | 0.07               | -1.44   |
|                  | THF           | 2.56          | 0.37    | -15.13     | -18.26  | -0.53                           | -1.55   | -10.20             | -6.61   |
| 3:1              | Chloroform    | 3.32          | 2.81    | -16.84     | -16.33  | -1.15                           | -2.87   | -15.47             | -7.57   |
|                  | Hexane        | 3.40          | 1.62    | -2.53      | -6.41   | 0.11                            | -0.14   | 1.65               | -0.23   |
|                  | THF           | 2.20          | 0.96    | -16.72     | -18.39  | -0.57                           | -1.91   | -11.90             | -10.81  |
| 1:1              | Chloroform    | 3.11          | 3.60    | -41.66     | -41.54  | -                               | -       | -                  | -       |
|                  | Hexane        | 4.28          | 2.81    | -28.86     | -35.96  | -                               | -       | -                  | -       |
|                  | THF           | 2.73          | 2.30    | -53.07     | -53.28  | -                               | -       | -                  | -       |

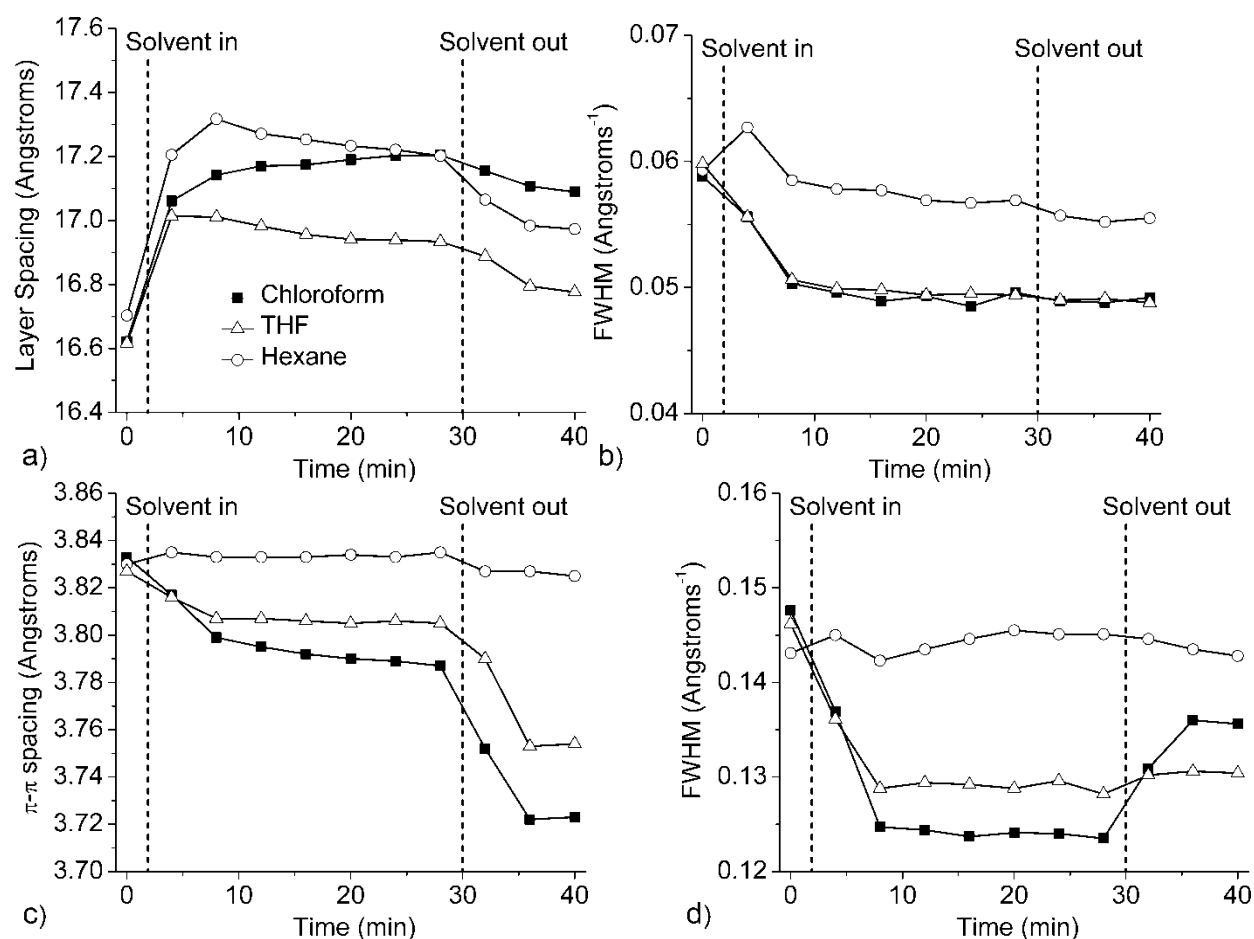

**Figure S4.** a) Layer spacing, b) Layer FWHM, c)  $\pi$ - $\pi$  stacking distance, d)  $\pi$ - $\pi$  FWHM for 3:1 blend thin films spin cast from 2 mg/mL in chloroform. The thin films exposed to chloroform vapor (solid squares), hexane vapor (open circles), and THF vapor (open triangles) are shown. Layer spacing values were determined by integration of the in-plane (100) peak, and the  $\pi$ - $\pi$  stacking distance was determined by integration of the nominally out-of-plane (020) peak.

**Table S4.** P3HT layer spacing, layer FWHM,  $\pi$ - $\pi$  stacking distance,  $\pi$ - $\pi$  FWHM for each solvent, before, during, and after SVA (for neat P3HT, 3-1, and 1-1 blends spin cast from 10 mg/mL in chloroform). Percent change can be found in Table S5 in the supporting information. Layer spacing values were determined by integration of the in-plane (100) peak, and the  $\pi$ - $\pi$  stacking distance was determined by integration of the nominally out-of-plane (020) peak.

| Film composition | Solvent vapor | Layer spacing |        |       | Layer FWHM |        |       | $\pi$ - $\pi$ stacking distance |        |       | $\pi$ - $\pi$ FWHM |        |       |
|------------------|---------------|---------------|--------|-------|------------|--------|-------|---------------------------------|--------|-------|--------------------|--------|-------|
|                  |               | before        | during | after | before     | during | after | before                          | during | after | before             | during | after |
| P3HT             | Chloroform    | 16.61         | 17.08  | 16.72 | 0.062      | 0.056  | 0.055 | 3.82                            | 3.79   | 3.77  | 0.172              | 0.133  | 0.148 |
|                  | THF           | 16.63         | 17.04  | 16.70 | 0.063      | 0.056  | 0.055 | 3.82                            | 3.81   | 3.78  | 0.175              | 0.147  | 0.153 |
| 3:1              | Chloroform    | 16.64         | 17.08  | 16.68 | 0.063      | 0.051  | 0.051 | 3.84                            | 3.81   | 3.81  | 0.145              | 0.116  | 0.124 |
|                  | THF           | 16.64         | 17.00  | 16.63 | 0.063      | 0.051  | 0.050 | 3.84                            | 3.82   | 3.82  | 0.148              | 0.120  | 0.127 |
| 1:1              | Chloroform    | 16.59         | 16.82  | 16.71 | 0.088      | 0.048  | 0.049 | -                               | -      | -     | -                  | -      | -     |
|                  | THF           | 16.38         | 16.70  | 16.55 | 0.084      | 0.047  | 0.047 | -                               | -      | -     | -                  | -      | -     |

**Table S5:** P3HT percent change for layer spacing, layer FWHM,  $\pi$ - $\pi$  stacking distance,  $\pi$ - $\pi$  FWHM for each solvent, before, during, and after SVA (for neat P3HT, 3-1, and 1-1 blends spin cast from 10 mg/mL in chloroform). Layer spacing values were determined by integration of the in-plane (100) peak, and the  $\pi$ - $\pi$  stacking distance was determined by integration of the nominally out-of-plane (020) peak.

| Film composition | Solvent vapor | Layer spacing |         | Layer FWHM |         | $\pi$ - $\pi$ stacking distance |         | $\pi$ - $\pi$ FWHM |         |
|------------------|---------------|---------------|---------|------------|---------|---------------------------------|---------|--------------------|---------|
|                  |               | % during      | % after | % during   | % after | % during                        | % after | % during           | % after |
| P3HT             | Chloroform    | 2.82          | 0.69    | -9.85      | -11.15  | -0.58                           | -1.13   | -22.80             | -14.44  |
|                  | THF           | 2.48          | 0.42    | -10.19     | -11.78  | -0.37                           | -1.07   | -16.27             | -12.67  |
| 3:1              | Chloroform    | 2.65          | 0.28    | -18.57     | -18.89  | -0.63                           | -1.41   | -20.51             | -14.87  |
|                  | THF           | 2.16          | -0.07   | -19.05     | -20.79  | -0.52                           | -1.28   | -19.10             | -14.24  |
| 1:1              | Chloroform    | 1.37          | 0.70    | -44.86     | -44.41  | -                               | -       | -                  | -       |
|                  | THF           | 1.92          | 1.01    | -44.19     | -44.19  | -                               | -       | -                  | -       |

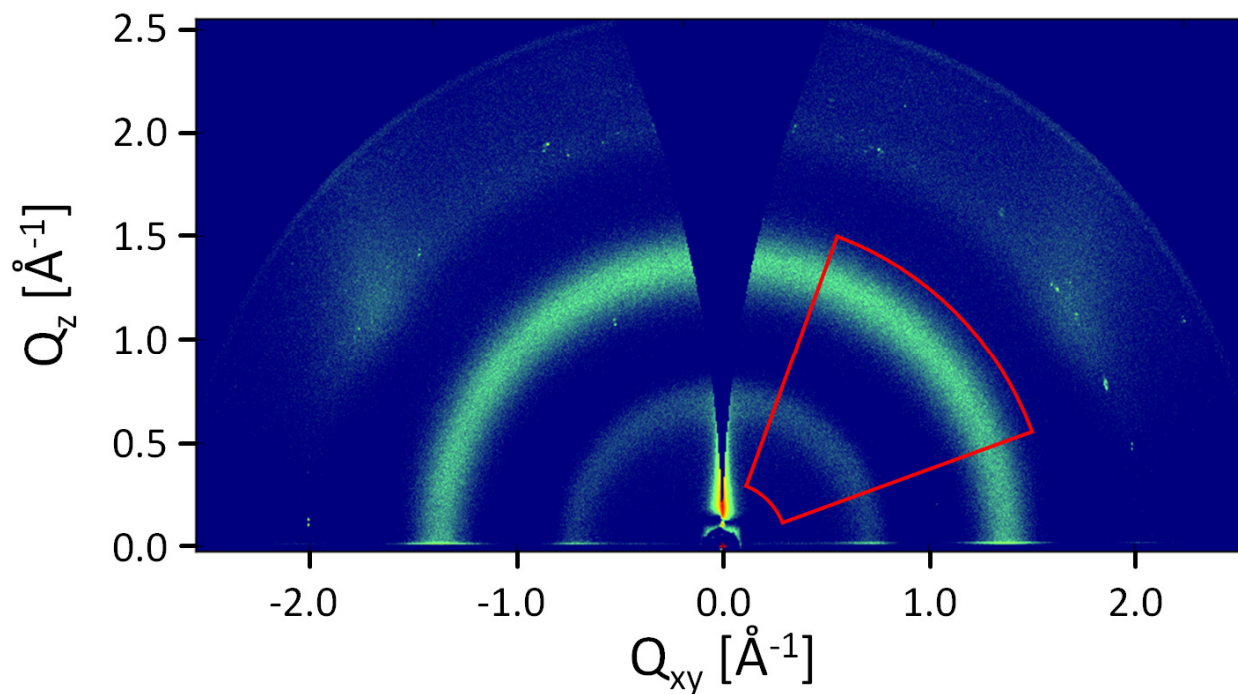

**Figure S5.** 2-D GIWAXS image of as-cast PCBM thin film. The red box indicates the region where the peak integration was taken ( $q = 0.3$  to  $1.6 \text{ \AA}^{-1}$  and  $\beta = 20$  to  $70^\circ$ )



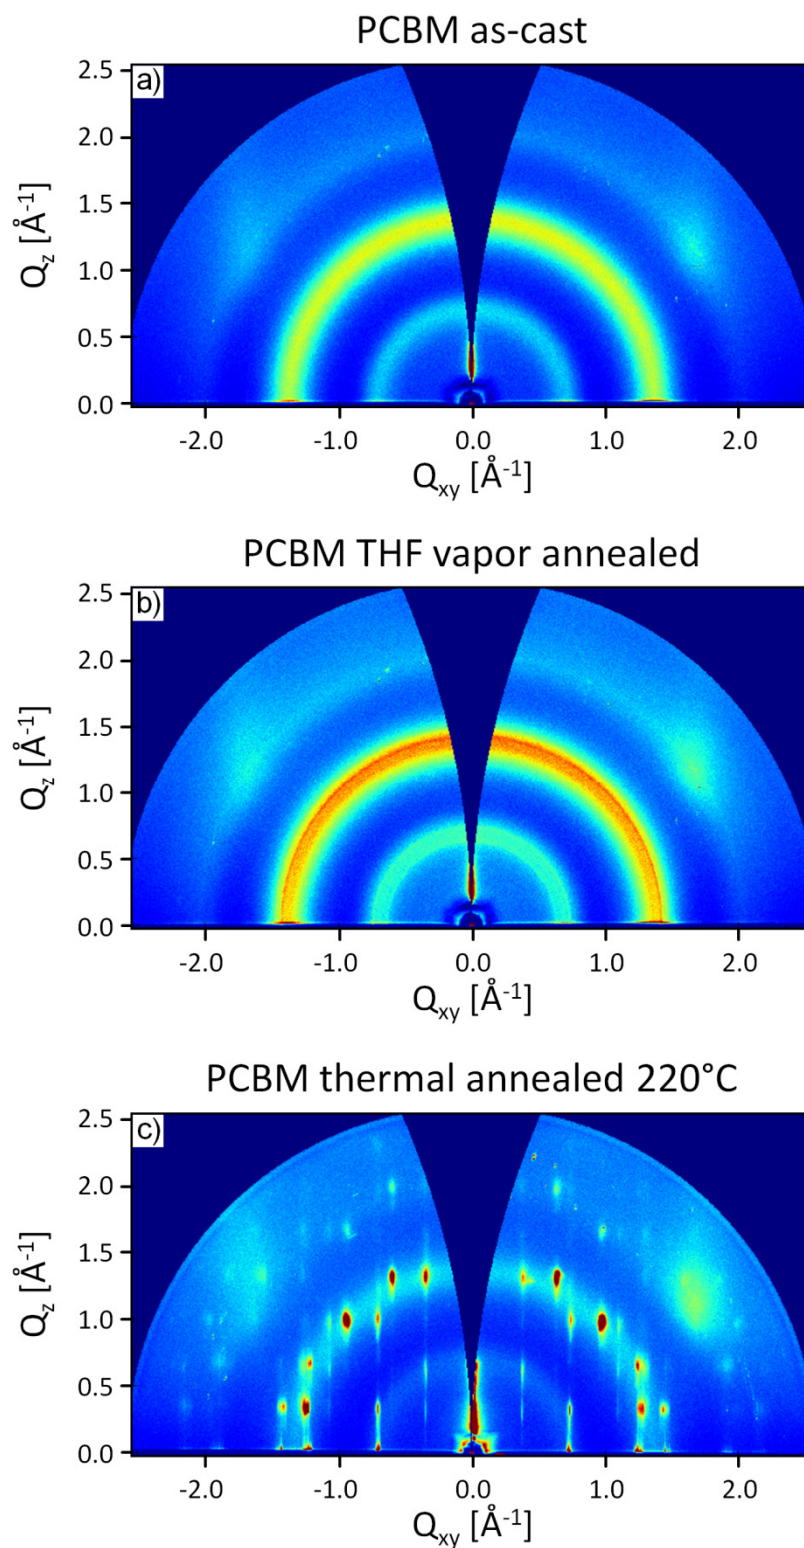

**Figure S6.** 2-D GIWAXS images of neat PCBM thin films spin cast from 10 mg/mL in chloroform a) as-cast, b) after exposure to THF vapor for 30 minutes, and c) after thermal annealing at 220 °C.

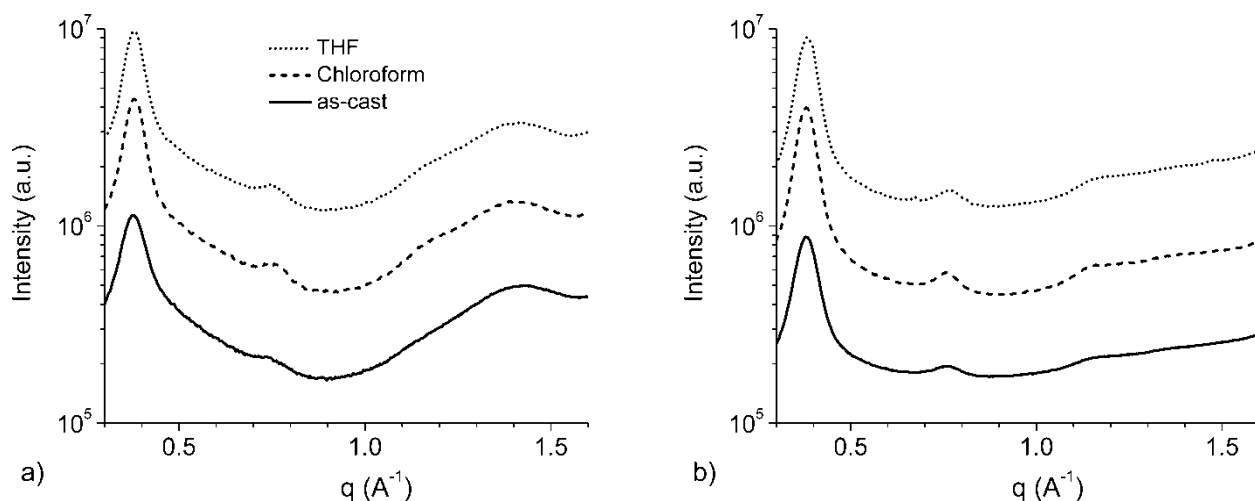

**Figure S7.** GIWAXS of a) 3:1 P3HT-PCBM blend and b) neat P3HT thin films spin cast from 10 mg/mL in chloroform. The as-cast thin films (solid line), thin films exposed to chloroform vapor (dashed line), and thin films exposed to THF vapor (dotted line) are shown. The data are presented with *arbitrary units* and have been *shifted for clarity*. The region selected for subsequent quantitative analysis is shown in Figure S5 of the supplementary information. The peaks observed at  $q \sim 0.37 \text{ \AA}^{-1}$  and  $\sim 0.75 \text{ \AA}^{-1}$  are the (100) and (200) peaks of the P3HT component, respectively.

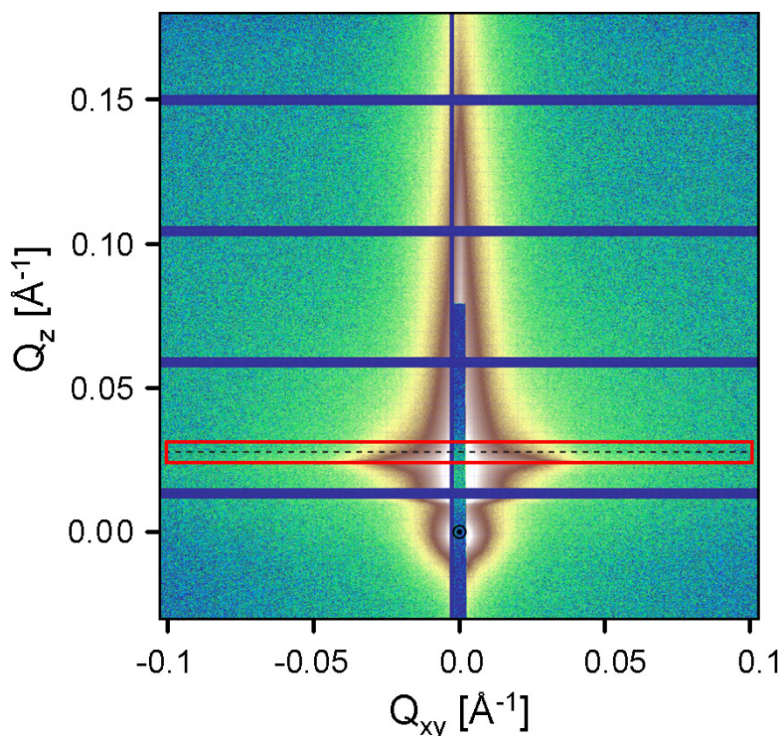

**Figure S8.** 2-D GISAXS image of a 1:1 P3HT-PCBM blend thin film. The red boxes indicate the region where the peak integration takes place ( $q_{xy} = -0.1$  to  $0.1 \text{ \AA}^{-1}$  and  $q_z = 0.0239$  to  $0.0303 \text{ \AA}^{-1}$ ). The lines with no scattering intensity are the gaps between the individual detectors.



**Table S6.** Domain sizes and Porod exponent determined by fitting the unified equation to the in-plane GISAXS data.

| Annealing Conditions       | Domain sizes [ $\text{\AA}$ ] | Porod exponent |
|----------------------------|-------------------------------|----------------|
| as-cast                    | -                             | 2.4            |
| SVA with hexane            | -                             | 2.0            |
| SVA with THF               | 61.6                          | 3.1            |
| SVA with chloroform        | 52.1                          | 3.5            |
| Thermal annealing at 140°C | 86.3                          | 3.2            |
| Thermal annealing at 175°C | 120.8                         | 2.8            |

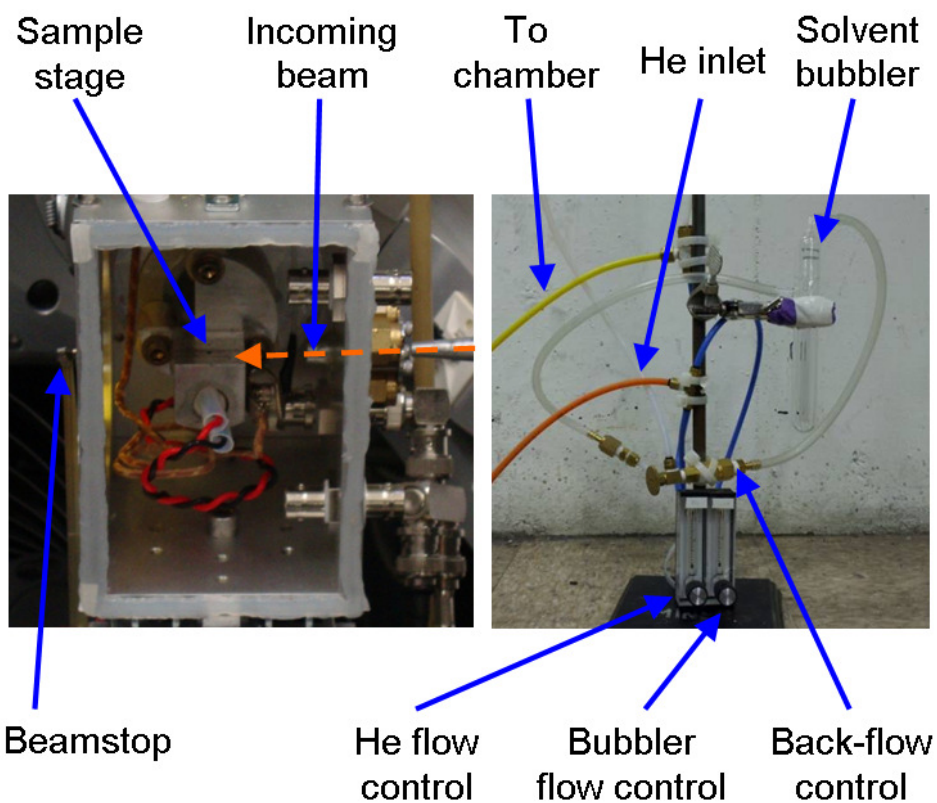

**Figure S9.** Images of in-situ solvent vapor annealing chamber.
